# Supplementary material for: Brochoscopic Airway Clearance Therapy vs. Conventional Sputum Aspiration: The Future of Flexible Brochoscopes in Intensive Care Units?
Source: MDPI journal article supplement (doi:10.3390/diagnostics13203276), 2023-10-22
Supplement: s1 [file s1]

**Supplementary Table S2.** Median survival days and 14,28,90-day of survival rates in hospital between different groups.

|                              | <b>Median survival days</b> | <b>14-day of survival rate (%)</b> | <b>28-day of survival rate (%)</b> | <b>90-day of survival rate (%)</b> |
|------------------------------|-----------------------------|------------------------------------|------------------------------------|------------------------------------|
| <b>Have bronchoscopy</b>     | 38                          | 91.7                               | 71.9                               | 17.1                               |
| <b>No bronchoscopy</b>       | 17                          | 60.5                               | 24.3                               | 4.9                                |
| <b>≤once every 3 days</b>    | 53                          | 94                                 | 91.8                               | 26.6                               |
| <b>&gt;once every 3 days</b> | 26                          | 89.1                               | 46.3                               | 3.9                                |
