# Supplementary material for: Brochoscopic Airway Clearance Therapy vs. Conventional Sputum Aspiration: The Future of Flexible Brochoscopes in Intensive Care Units?
Source: MDPI journal article supplement (doi:10.3390/diagnostics13203276), 2023-10-22
Supplement: s1 [file s1]

**Supplementary Table S1.** Comparisons of other laboratory results between the bronchoscopy group and non-bronchoscopy group.

| Blood parameters          | biochemical          |                     |                  |
|---------------------------|----------------------|---------------------|------------------|
| <b>Glu (mmol/L)</b>       |                      |                     |                  |
| Pre treatment             | 10.3(7.68,13.8)      | 9.2(6.9,14.8)       | 0.577            |
| Post treatment            | 5.8(4.9,7.3)         | 8.7(5.86,11.5)      | <b>&lt;0.001</b> |
| P value                   | <b>&lt;0.001</b>     | <b>0.070</b>        |                  |
| <b>ALT (u/L)</b>          |                      |                     |                  |
| Pre treatment             | 47.4(24.575,108.175) | 53.3(38.9,60)       | 0.445            |
| Post treatment            | 32.8(16.3,61.8)      | 33.6(21.55,62.05)   | 0.476            |
| P value                   | <b>&lt;0.001</b>     | <b>0.028</b>        |                  |
| <b>AST (u/L)</b>          |                      |                     |                  |
| Pre treatment             | 57.2(34.6,113.1)     | 60.4(48.55,76.85)   | 0.498            |
| Post treatment            | 31.9(20.8,47.7)      | 37.2(23.85,70.1)    | 0.116            |
| P value                   | <b>&lt;0.001</b>     | <b>0.049</b>        |                  |
| <b>Urea (mmol/L)</b>      |                      |                     |                  |
| Pre treatment             | 12.1(8,20.3)         | 15.3(9.5,20.36)     | 0.123            |
| Post treatment            | 8.5(4.8,15.1)        | 11.4(6.735,21.68)   | <b>0.037</b>     |
| P value                   | <b>&lt;0.001</b>     | 0.272               |                  |
| <b>Cr (ummol/L)</b>       |                      |                     |                  |
| Pre treatment             | 90.8(51.3,139)       | 113(64.6,184.4)     | 0.077            |
| Post treatment            | 61(41,95)            | 115(65.45,230.55)   | <b>&lt;0.001</b> |
| P value                   | <b>&lt;0.001</b>     | 0.955               |                  |
| <b>Alb (g/L)</b>          |                      |                     |                  |
| Pre treatment             | 31.8(28.8,35)        | 33.7(28.95,36.2)    | 0.126            |
| Post treatment            | 34.9798±6.83641      | 30(25.75,35.1)      | <b>&lt;0.001</b> |
| P value                   | <b>&lt;0.001</b>     | <b>0.011</b>        |                  |
| <b>myocardium markers</b> |                      |                     |                  |
| <b>TnI (ng/mL)</b>        |                      |                     |                  |
| Pre treatment             | 0.09(0.016,0.7950)   | 0.046(0.0116,0.2155 | 0.143            |
| Post treatment            | 0.014(0.004,0.198)   | )                   | <b>&lt;0.001</b> |
| P value                   | <b>&lt;0.001</b>     | 0.127(0.034,0.3575) |                  |
|                           |                      | <b>0.049</b>        |                  |
| <b>BNP (pg/ml)</b>        |                      |                     |                  |
| Pre treatment             | 232(90.5,598.5)      | 96.45(46.635,643.7) | 0.131            |
| Post treatment            | 105(31.3,286.7)      | 455.72(74.38,1331.0 | <b>&lt;0.001</b> |
| P value                   | <b>&lt;0.001</b>     | 5                   |                  |
|                           |                      | <b>0.002</b>        |                  |
| <b>D-dimer (mg/L)</b>     |                      |                     |                  |
| Pre treatment             | 4.18(1.68,11.12)     | 5.56(4.005,6.700)   | 0.154            |
| Post treatment            | 1.36(0.86,2.40)      | 2.11(1.325,6.545)   | <b>&lt;0.001</b> |
| P value                   | <b>&lt;0.001</b>     | <b>0.002</b>        |                  |

**Abbreviations:** ALT: alanine aminotransferase; AST: asparate aminotransferase; Cr:

creatinine; Alb: albumin; TnI: troponin I; BNP: brain natriuretic peptide.
