# Supplementary material for: Brochoscopic Airway Clearance Therapy vs. Conventional Sputum Aspiration: The Future of Flexible Brochoscopes in Intensive Care Units?
Source: Diagnostics (Basel). 2023 Oct 22;13(20):3276. doi: 10.3390/diagnostics13203276 (PMC10606468; doi:10.3390/diagnostics13203276)
Supplement: Supplementary file 1 [file diagnostics-13-03276-s001.zip]

Archive with 4 entries (4 files):
- Supplementary figure S1.tif
- Supplementary figure S2.tif
- Supplementary table S1.pdf
- Supplementary table S2.pdf
